# Supplementary material
Source: PubMed Central journal article supplement (PMC4230063)
Supplement: ijcep0007-6694-f5.pdf [file ijcep0007-6694-f5.pdf]

## IGF1R expression and survival in non-small cell lung cancer patients

**Table S1.** Result of the methodological assessment by the European lung cancer working party score

| Subgroups        | No. of studies (%) | Global score % (Mean [95% CI]) | P-values |
|------------------|--------------------|--------------------------------|----------|
| Publication year |                    |                                |          |
| Before 2010      | 7 (41.2%)          | 59.43 (53.02-65.84)            | 0.332    |
| After 2010       | 10 (58.8%)         | 62.81 (57.96-67.65)            |          |
| Results          |                    |                                |          |
| Positive         | 4 (23.5%)          | 62.59 (48.23-76.94)            | 0.783    |
| Negative         | 4 (23.5%)          | 62.84 (59.22-66.47)            |          |
| N*               | 8 (53.0%)          | 60.26 (54.42-66.11)            |          |
| Patient number   |                    |                                |          |
| < 150            | 6 (35.3%)          | 60.70 (56.91-64.49)            | 0.762    |
| ≥ 150            | 11 (64.7%)         | 61.80 (56.28-67.34)            |          |
| Ethnicity        |                    |                                |          |
| Asian            | 13 (76.5%)         | 61.81 (58.17-65.45)            | 0.681    |
| non-Asian        | 4 (23.5%)          | 60.13 (44.12-76.14)            |          |

Positive: Studies identifying IGF1R positivity as a significant poor prognosis factor. Negative: Studies reporting IGF1R positivity as a good prognosis factor. N\*: Studies reporting IGF1R positivity as non-significant association with poor prognosis.

**Table S2.** IGF1R expression and clinical outcomes in patients with NSCLC

| Author & year        | Overall survival    |      |            |                       |      |           | Disease-free survival |      |           |                       |      |           |
|----------------------|---------------------|------|------------|-----------------------|------|-----------|-----------------------|------|-----------|-----------------------|------|-----------|
|                      | Univariate analysis |      |            | Multivariate analysis |      |           | Univariate analysis   |      |           | Multivariate analysis |      |           |
|                      | HR estimation       | HR   | 95% CI     | HR estimation         | HR   | 95% CI    | HR estimation         | HR   | 95% CI    | HR estimation         | HR   | 95% CI    |
| Gately K. 2013       | K-M                 | 0.84 | 0.50-1.43  |                       |      |           |                       |      |           |                       |      |           |
| Zhang XY. 2013       |                     |      |            |                       |      |           | HR                    | 1.11 | 0.86-1.44 |                       |      |           |
| Xu C. 2013           |                     |      |            |                       |      |           | K-M                   | 1.54 | 1.02-2.32 | HR                    | 1.25 | 0.79-1.96 |
| Ludovini V. 2013     | HR                  | 1.55 | 0.93-2.59  |                       |      |           | HR                    | 1.59 | 0.91-2.77 |                       |      |           |
| Yamamoto T. 2012     |                     |      |            | HR                    | 2.32 | 1.22-4.44 |                       |      |           |                       |      |           |
| Tsuta K. 2012        | K-M                 | 0.98 | 0.75-1.28  |                       |      |           |                       |      |           |                       |      |           |
| Kim YH. 2012         | K-M                 | 0.61 | 0.31-1.23  |                       |      |           | K-M                   | 0.78 | 0.47-1.3  |                       |      |           |
| Kim JS. 2012         | K-M                 | 1.02 | 0.79-1.31  |                       |      |           | K-M                   | 1.29 | 1.02-1.63 |                       |      |           |
| Kikuchi R. 2011      |                     |      |            | HR                    | 0.56 | 0.32-0.95 |                       |      |           |                       |      |           |
| Nakagawa M. 2011     |                     |      |            |                       |      |           | HR                    | 2.68 | 1.27-5.68 | HR                    | 2.51 | 1.18-5.44 |
| Dziadziuszko R. 2010 | HR                  | 0.70 | 0.53-0.90  | HR                    | 0.75 | 0.57-0.99 |                       |      |           |                       |      |           |
| Ning XH. 2010        | K-M                 | 0.96 | 0.35-2.67  |                       |      |           |                       |      |           |                       |      |           |
| Cappuzzo F. 2009     | K-M                 | 0.94 | 0.78-1.13  |                       |      |           |                       |      |           |                       |      |           |
| Chang MH. 2009       | K-M                 | 0.90 | 0.62-1.30  |                       |      |           |                       |      |           |                       |      |           |
| Gong YX. 2009        | K-M                 | 1.05 | 0.67-1.64  |                       |      |           |                       |      |           |                       |      |           |
| Lee CY. 2008         | K-M                 | 4.90 | 0.37-65.30 |                       |      |           |                       |      |           |                       |      |           |
| Cappuzzo F. 2006     | K-M                 | 0.51 | 0.29-0.87  | HR                    | 0.43 | 0.23-0.80 |                       |      |           |                       |      |           |

IGF1R: Insulin-like growth factor-1 receptor; K-M: Kaplan-Meier curve; HR: Hazard ratio.

## IGF1R expression and survival in non-small cell lung cancer patients

**Table S3.** Information of antibody sources

| Author          | Year | Species           | Suppliers                               | Dilution |
|-----------------|------|-------------------|-----------------------------------------|----------|
| Gately K.       | 2013 | Rabbit monoclonal | Ventana Medical Systems, Tucson, AZ     | 1:100    |
| Zhang XY        | 2013 | Mouse             | BioSource International, Camarillo, USA | 1:50     |
| Xu C.           | 2013 | Rabbit            | Abcam, Cambridge, UK                    | 1:100    |
| Ludovini V.     | 2013 | Mouse             | Lab Vision Neomarkers, USA              | 1:50     |
| Yamamoto T.     | 2012 | Rabbit polyclonal | Signalway Antibody, Pearland, USA       | 1:100    |
| Tsuta K.        | 2012 | Rabbit monoclonal | Ventana Medical Systems, Tucson, AZ     | NA       |
| Kim YH          | 2012 | Rabbit monoclonal | Ventana Medical Systems, Tucson, AZ     | 1:1      |
| Kim JS          | 2012 | NA                | Cell Signaling Technology, Danvers, MA  | NA       |
| Kikuchi R.      | 2011 | Rabbit polyclonal | Cell Signaling Technology, Danvers, MA  | 1:100    |
| Nakagawa M.     | 2011 | Mouse monoclonal  | Abcam, Cambridge, USA                   | 1:500    |
| Dziadziuszko R. | 2010 | NA                | Ventana Medical Systems, Tucson, AZ     | NA       |
| Ning XH         | 2010 | Rabbit            | Boster, Wuhan, CHN                      | 1:50     |
| Cappuzzo F.     | 2009 | NA                | Novus Biologicals, Littleton, CO        | NA       |
| Chang MH        | 2009 | Mouse monoclonal  | Abcam, Cambridge, UK                    | 1:1000   |
| Gong YX         | 2009 | Rabbit monoclonal | Ventana-Roche, Tucson, AZ               | NA       |
| Lee CY          | 2008 | Mouse monoclonal  | BioSource International, Camarillo, USA | 1:50     |
| Cappuzzo F.     | 2006 | Mouse             | Novus Biologicals, Littleton, CO        | 1:50     |

NA: Not available.
